# Supplementary material for: Evaluation of the Impact of the Urgent Cancer Care Clinic on Emergency Department Visits, Primary Care Clinician Visits, and Hospitalizations in Winnipeg, Manitoba
Source: MDPI journal article supplement (doi:10.3390/curroncol30070496), 2023-07-18
Supplement: s1 [file s1]

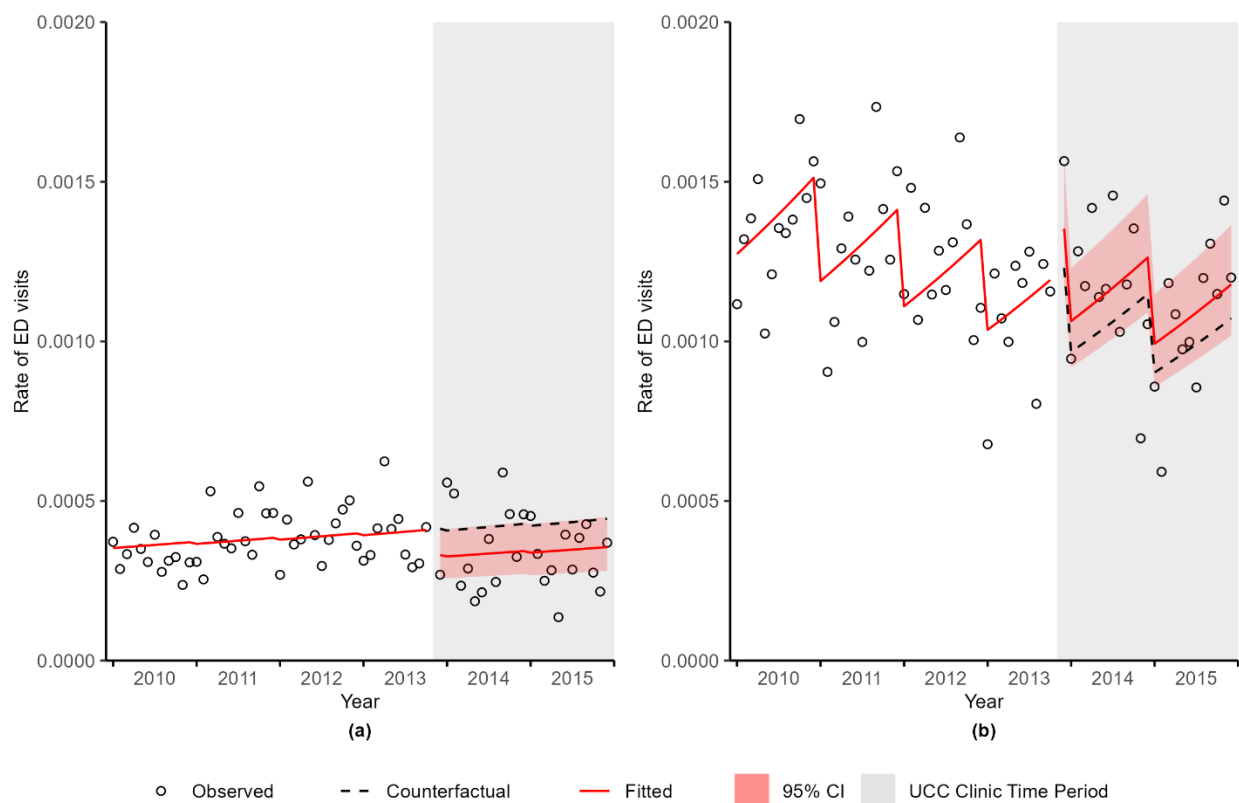

**Figure S1.** Rate (per person-days) of emergency department visits during the urgent cancer care clinic hours of operation for **(a)** CTAS scores 1 to 2 and **(b)** CTAS scores 3 to 5 by month, Winnipeg, Manitoba. Abbreviations: CTAS – Canadian Triage and Acuity Scale; ED – emergency department; UCC – urgent cancer care; CI – confidence interval.

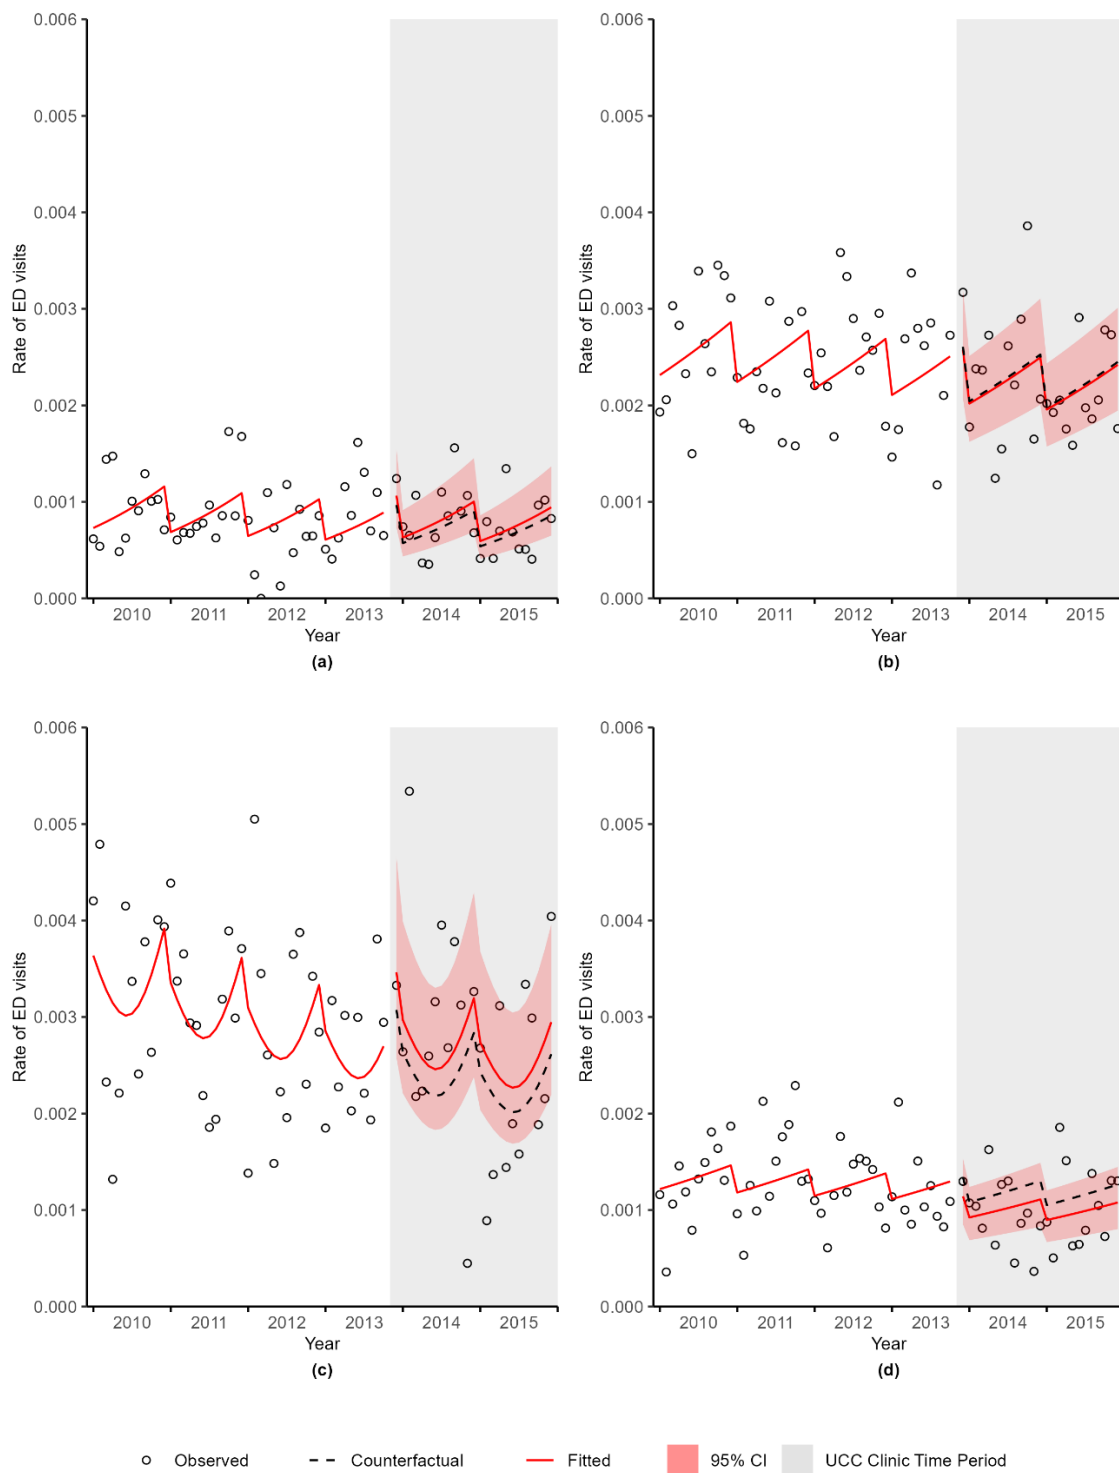

**Figure S2.** Rate (per person-days) of emergency department visits during the urgent cancer care clinic hours of operation for **(a)** breast cancer, **(b)** digestive cancers, **(c)** lung cancer, and **(d)** genitourinary cancers by month, Winnipeg, Manitoba.

**Table S1.** Cancer type categories.

| <b>Cancer type category</b> | <b>Individual cancer sites</b>                                                                                                                                                                                      |
|-----------------------------|---------------------------------------------------------------------------------------------------------------------------------------------------------------------------------------------------------------------|
| Breast                      | Breast                                                                                                                                                                                                              |
| Digestive                   | Esophagus, Stomach, Small Intestine, Colon, Rectal, Anus, Liver, Gallbladder, Pancreas, Other Digestive System                                                                                                      |
| Lung                        | Lung and bronchus                                                                                                                                                                                                   |
| Genitourinary               | Cervix uteri, Corpus uteri, Uterus NOS, Ovary, Other Female Genital System, Prostate, Testis, Penis, Other Male Genital System, Bladder, Kidney and Renal Pelvis, Ureter, Other Urinary System                      |
| Hematologic                 | Hodgkin's Lymphoma, Non-Hodgkin's Lymphoma, Multiple Myeloma, Acute Lymphocytic Leukemia, Chronic Lymphocytic Leukemia, Acute Myeloid Leukemia, Acute monocytic Leukemia, Chronic Myeloid Leukemia, Other Leukemias |

**Table S2.** Ratios and 95% confidence intervals between fitted and counterfactual values.

| <b>Outcome</b>                           | <b>Ratio</b> | <b>95% Confidence Interval</b> | <b>p-value</b> |
|------------------------------------------|--------------|--------------------------------|----------------|
| PCC visits                               | 1.06         | 1.00 - 1.13                    | 0.0389         |
| Hospitalizations                         | 1.07         | 0.99 - 1.15                    | 0.0737         |
| ED visits                                | 0.96         | 0.86 - 1.08                    | 0.5053         |
| ED visits during UCC clinic hours        | 1.03         | 0.92 - 1.17                    | 0.5778         |
| ED visits at Health Sciences Centre      | 1.32         | 1.00 - 1.74                    | 0.0500         |
| ED visits at St. Boniface Hospital       | 0.69         | 0.54 - 0.89                    | 0.0041         |
| ED visits at Seven Oaks General Hospital | 0.72         | 0.49 - 1.04                    | 0.0818         |
| ED visits at Grace Hospital              | 1.05         | 0.75 - 1.47                    | 0.7719         |
| ED visits at Concordia Hospital          | 1.29         | 0.88 - 1.90                    | 0.1913         |
| ED visits CTAS score 1-2                 | 0.80         | 0.63 - 1.01                    | 0.0641         |
| ED visits CTAS score 3-5                 | 1.10         | 0.95 - 1.27                    | 0.2007         |
| ED visits for breast cancer              | 1.10         | 0.76 - 1.60                    | 0.6103         |
| ED visits for digestive cancers          | 0.99         | 0.79 - 1.23                    | 0.9136         |
| ED visits for lung cancer                | 1.13         | 0.84 - 1.51                    | 0.4272         |
| ED visits for genitourinary cancers      | 0.85         | 0.64 - 1.14                    | 0.2890         |

Abbreviations: CTAS – Canadian Triage and Acuity Scale; ED – emergency department; UCC – urgent cancer care; PCC – primary care clinician.
